# Supplementary material
Source: Springer Nature journal article supplement (http://www.springermedizin.de/resource/supplementary/12887_2010_432_MOESM1_ESM.pdf/9475136)

M 1 2 3 4 5 6 7 8 9 10 A1 A2 A3 A4 B1 B2 B3 B4 M

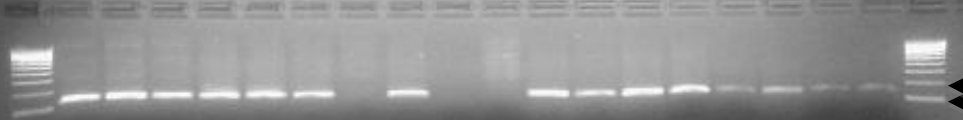

200  
bp  
100bp

**POL**

M 1 2 3 4 5 6 7 8 9 10 A1 A2 A3 A4 B1 B2 B3 B4 M

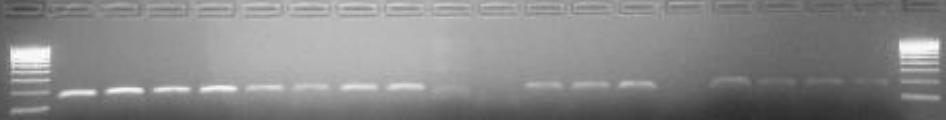

**GAG**

Supplement: MOESM1 [file 9475136]
